# Supplementary material for: Extent and Distribution of Parenchymal Abnormalities in Baseline CT-Scans Do Not Predict Awake Prone Positioning Response in COVID-19 Related ARDS
Source: MDPI journal article supplement (doi:10.3390/diagnostics12081848), 2022-07-30
Supplement: s1 [file s1]

# Supplementary

**Table S1.** Demographic and clinical features (\*Responders: PaO<sub>2</sub>/FiO<sub>2</sub> S2>S1 more than 10%). Data are reported as mean (standard deviation) or median [interquartile] according to their distribution. SP1: supine position before postural change; PP: prone position; SP2: supine position after resupination. Significant difference in bold.

|                                               | All patients<br>(n = 45) | Responders*<br>(n = 22) | Non responders*<br>(n = 23) | p-value         |
|-----------------------------------------------|--------------------------|-------------------------|-----------------------------|-----------------|
| Male gender, n (%)                            | 33 (73)                  | 15 (68)                 | 18 (78)                     | 0.45            |
| Age, years                                    | 63 (12)                  | 63 (10)                 | 65 (14)                     | 0.67            |
| BMI, Kg/m <sup>2</sup>                        | 27.3 (3.7)               | 28.1 (3.0)              | 26.6 (4.2)                  | 0.17            |
| Interval Symptoms-Hospital Admission, days    | 6 [4;8]                  | 7 [4;9]                 | 6 [4;7]                     | 0.44            |
| Interval Hospital Admission-SubICU, days      | 1 [1;4]                  | 3 [1;4]                 | 1 [0;2]                     | <b>0.02</b>     |
| NIV Duration, days                            | 6 [4;9]                  | 8 [4;11]                | 5 [2;8]                     | 0.14            |
| PEEP, cmH <sub>2</sub> O                      | 8 [6;9]                  | 8 [6;8]                 | 8 [7;9]                     | 0.32            |
| Pressure Support, cmH <sub>2</sub> O          | 8 [6;10]                 | 8 [6;9]                 | 8 [6;10]                    | 0.78            |
| Charlson Index                                | 4 [3;5]                  | 4 [2;5]                 | 4 [3;6]                     | 0.44            |
| Hemoglobin, g/dL                              | 14.0 [12.5;14.8]         | 13.9 [12.9;14.5]        | 14.1 [12.4;15.4]            | 0.59            |
| Platelets, *10 <sup>9</sup> /L                | 206 [159;272]            | 198 [156;253]           | 227 [159;289]               | 0.30            |
| LDH, U/L                                      | 399 [311;468]            | 378 [293;466]           | 407 [314;480]               | 0.37            |
| C-Reactive Protein, mg/dL                     | 8.1 [4.5;15.8]           | 8.1 [5.1;16.1]          | 8.1 [4.4;15.8]              | 0.77            |
| D-Dimer, ng/mL                                | 682 [506;1099]           | 608 [504;865]           | 695 [507;1333]              | 0.41            |
| Pulmonary trombo-embolism, n (%)              | 2 (4)                    | 1 (5)                   | 1 (4)                       | 0.97            |
| <b>Supine position before prone position</b>  |                          |                         |                             |                 |
| Respiratory rate, acts/min                    | 20 [18;25]               | 20 [18;22]              | 20 [18;25]                  | 0.47            |
| pH                                            | 7.45 [7.43;7.47]         | 7.45 [7.43;7.47]        | 7.45 [7.42;7.47]            | 0.77            |
| PaCO <sub>2</sub> , mmHg                      | 35.0 (3.8)               | 35.0 (3.9)              | 35.0 (3.8)                  | 0.98            |
| HCO <sub>3</sub> <sup>-</sup> , mmol/L        | 25.0 [24.0;27.1]         | 25.1 [24.5;27.1]        | 24.6 [23.9;29.0]            | 0.87            |
| PaO <sub>2</sub> /FiO <sub>2</sub>            | 140 [108;169]            | 134 [114;158]           | 141 [107;181]               | 0.59            |
| <b>Prone position</b>                         |                          |                         |                             |                 |
| Respiratory rate, acts/min                    | 19 (4)                   | 19 (5)                  | 19 (4)                      | 0.80            |
| PaO <sub>2</sub> /FiO <sub>2</sub>            | 246 (105)                | 278 (80)                | 216 (119)                   | <b>0.05</b>     |
| <b>Supine position after prone position</b>   |                          |                         |                             |                 |
| Respiratory rate, acts/min                    | 20 [18;25]               | 20 [16;23]              | 20 [18;25]                  | 0.30            |
| PaO <sub>2</sub> /FiO <sub>2</sub> , mmHg/%   | 157 [111;198]            | 188 [149;245]           | 112 [102;165]               | <b>&lt;0.01</b> |
| <b>Delta</b>                                  |                          |                         |                             |                 |
| PaO <sub>2</sub> /FiO <sub>2</sub> PP-SP1     | 98 (84)                  | 140 (74)                | 57 (73)                     | <b>&lt;0.01</b> |
| PaO <sub>2</sub> /FiO <sub>2</sub> PP1-SP1, % | 67 [21;113]              | 105 [42;137]            | 23 [-5;77]                  | <b>&lt;0.01</b> |
| PaO <sub>2</sub> /FiO <sub>2</sub> SP2-SP1    | 13 [-9;44]               | 44 [28;67]              | -8 [-22;2]                  | <b>&lt;0.01</b> |
| PaO <sub>2</sub> /FiO <sub>2</sub> SP2-SP1, % | 9 [-6 ;36]               | 36 [19;64]              | -4 [-16;2]                  | <b>&lt;0.01</b> |

**Table S2.** Chest CT parenchymal abnormalities and distribution (\*Responders: PaO<sub>2</sub>/FiO<sub>2</sub> S2>S1 more than 10%). Data indicates the percentage, if not otherwise specified, and are expressed as mean (standard deviation) or median [interquartile] according to their distribution. Significant difference in bold.

|                                 | All patients<br>(n = 45) | Responders*<br>(n = 22) | Non responders*<br>(n = 23) | p-value     |
|---------------------------------|--------------------------|-------------------------|-----------------------------|-------------|
| <b>OVERALL</b>                  |                          |                         |                             |             |
| Healthy parenchyma              | 50 (17)                  | 52 (15)                 | 48 (18)                     | 0.36        |
| Emphysema                       | 0.02 [0.00;0.08]         | 0.00 [0.00;0.07]        | 0.03 [0.00;0.15]            | 0.14        |
| Ground glass                    | 44 (14)                  | 42 (12)                 | 47 (15)                     | 0.23        |
| Consolidation                   | 4 [2;9]                  | 4 [2;9]                 | 5 [2;8]                     | 0.63        |
| Ground glass + consolidation    | 51 (16)                  | 48 (15)                 | 54 (17)                     | 0.23        |
| <b>ANTERIOR</b>                 |                          |                         |                             |             |
| Healthy parenchyma              | 61 (15)                  | 63 (14)                 | 58 (16)                     | 0.25        |
| Emphysema                       | 0.01 [0.00;0.09]         | 0.01 [0.00;0.04]        | 0.02 [0.00;0.13]            | 0.33        |
| Ground glass                    | 37 (14)                  | 34 (13)                 | 39 (15)                     | 0.29        |
| Consolidation                   | 1 [0;2]                  | 1 [1;3]                 | 1 [1;2]                     | 0.98        |
| Ground glass + consolidation    | 39 (15)                  | 36 (14)                 | 41 (16)                     | 0.29        |
| <b>POSTERIOR</b>                |                          |                         |                             |             |
| Healthy parenchyma              | 38 (18)                  | 42 (18)                 | 34 (18)                     | 0.14        |
| Emphysema                       | 0.00 [0.00;0.05]         | 0.00 [0.00;0.01]        | 0.02 [0.00;0.06]            | <b>0.02</b> |
| Ground glass                    | 51 (16)                  | 48 (13)                 | 54 (17)                     | 0.21        |
| Consolidation                   | 7 [3;15]                 | 7 [3;15]                | 8 [4;17]                    | 0.60        |
| Ground glass + consolidation    | 62 (18)                  | 58 (18)                 | 66 (18)                     | 0.16        |
| <b>POSTERIOR/ANTERIOR RATIO</b> |                          |                         |                             |             |
| Healthy parenchyma              | 0.6 (0.2)                | 0.6 (0.2)               | 0.6 (0.2)                   | 0.21        |
| Ground glass                    | 1.5 (0.4)                | 1.5 (0.4)               | 1.5 (0.4)                   | 0.80        |
| Consolidation                   | 4.4 [2.5;6.4]            | 4.3 [2.9;6.1]           | 4.5 [2.4;8.1]               | 0.62        |
| Ground glass + consolidation    | 1.7 (0.4)                | 1.7 (0.4)               | 1.7 (0.4)                   | 0.90        |

**Table S3.** Demographic and clinical features (\*Responders: PaO<sub>2</sub>/FiO<sub>2</sub> S2>S1 more than 20%). Data are reported as mean (standard deviation) or median [interquartile] according to their distribution. SP1: supine position before postural change; PP: prone position; SP2: supine position after resupination. Significant difference in bold.

|                                               | All patients<br>(n = 45) | Responders*<br>(n = 16) | Non responders*<br>(n = 29) | p-value         |
|-----------------------------------------------|--------------------------|-------------------------|-----------------------------|-----------------|
| Male gender, n (%)                            | 33 (73)                  | 11 (69)                 | 22 (76)                     | 0.61            |
| Age, years                                    | 63 (12)                  | 64 (11)                 | 64 (13)                     | 0.34            |
| BMI, Kg/m <sup>2</sup>                        | 27.3 (3.7)               | 28.0 (3.0)              | 27.0 (4.1)                  | 0.70            |
| Interval Symptoms-Hospital Admission, days    | 6 [4;8]                  | 6 [3;7]                 | 7 [4;9]                     | 0.25            |
| Interval Hospital Admission-SubICU, days      | 1 [1;4]                  | 2 [1;4]                 | 1 [0;4]                     | 0.12            |
| NIV Duration, days                            | 6 [4;9]                  | 8 [4;12]                | 5 [4;8]                     | 0.17            |
| PEEP, cmH <sub>2</sub> O                      | 8 [6;9]                  | 7 [6;8]                 | 8 [7;10]                    | 0.07            |
| Pressure Support, cmH <sub>2</sub> O          | 8 [6;10]                 | 8 [6;10]                | 8 [6;9]                     | 0.34            |
| Charlson Index                                | 4 [3;5]                  | 4 [3;5]                 | 4 [3;6]                     | 0.66            |
| Hemoglobin, g/dL                              | 14.0 [12.5;14.8]         | 13.9 [12.9;14.4]        | 14.1 [12.5;15.2]            | 0.60            |
| Platelets, *10 <sup>9</sup> /L                | 206 [159;272]            | 182 [128;239]           | 241 [168;290]               | <b>0.02</b>     |
| LDH, U/L                                      | 399 [311;468]            | 398 [324;470]           | 405 [302;469]               | 0.90            |
| C-Reactive Protein, mg/dL                     | 8.1 [4.5;15.8]           | 6.3 [4.6;14.3]          | 11.4 [4.5;16.2]             | 0.36            |
| D-Dimer, ng/mL                                | 682 [506;1099]           | 582 [499;843]           | 695 [507;1431]              | 0.33            |
| Pulmonary trombo-embolism, n (%)              | 2 (4)                    | 1 (6)                   | 1 (3)                       | 0.66            |
| <b>Supine position before prone position</b>  |                          |                         |                             |                 |
| Respiratory rate, acts/min                    | 20 [18;25]               | 21 [18;24]              | 19 [17;25]                  | 0.59            |
| pH                                            | 7.45 [7.43;7.47]         | 7.46 [7.43;7.49]        | 7.44 [7.42;7.47]            | 0.48            |
| PaCO <sub>2</sub> , mmHg                      | 35.0 (3.8)               | 35.0 (3.9)              | 35.0 (3.8)                  | 0.94            |
| HCO <sub>3</sub> <sup>-</sup> , mmol/L        | 25.0 [24.0;27.1]         | 25.3 [23.4;27.0]        | 25.0 [24.0;27.8]            | 0.90            |
| PaO <sub>2</sub> /FiO <sub>2</sub>            | 140 [108;169]            | 127 [98;151]            | 145 [108;195]               | 0.13            |
| <b>Prone position</b>                         |                          |                         |                             |                 |
| Respiratory rate, acts/min                    | 19 (4)                   | 21 (5)                  | 19 (4)                      | 0.19            |
| PaO <sub>2</sub> /FiO <sub>2</sub>            | 246 (105)                | 287 (76)                | 224 (113)                   | <b>0.03</b>     |
| <b>Supine position after prone position</b>   |                          |                         |                             |                 |
| Respiratory rate, acts/min                    | 20 [18;25]               | 21 [18;24]              | 20 [16;25]                  | 0.46            |
| PaO <sub>2</sub> /FiO <sub>2</sub> , mmHg/%   | 157 [111;198]            | 188 [142;238]           | 128 [104;182]               | <b>0.02</b>     |
| <b>Delta</b>                                  |                          |                         |                             |                 |
| PaO <sub>2</sub> /FiO <sub>2</sub> PP-SP1     | 98 (84)                  | 161 (70)                | 63 (70)                     | <b>&lt;0.01</b> |
| PaO <sub>2</sub> /FiO <sub>2</sub> PP1-SP1, % | 67 [21;113]              | 118 [93;165]            | 31 [10;73]                  | <b>&lt;0.01</b> |
| PaO <sub>2</sub> /FiO <sub>2</sub> SP2-SP1    | 13 [-9;44]               | 53 [31;92]              | -4 [-21;13]                 | <b>&lt;0.01</b> |
| PaO <sub>2</sub> /FiO <sub>2</sub> SP2-SP1, % | 9 [-6 ;36]               | 47 [32;69]              | -2 [-13;9]                  | <b>&lt;0.01</b> |

**Table S4.** Chest CT parenchymal abnormalities and distribution (\*Responders: PaO<sub>2</sub>/FiO<sub>2</sub> S2>S1 more than 20%). Data indicates the percentage, if not otherwise specified, and are expressed as mean (standard deviation) or median [interquartile] according to their distribution. Significant difference in bold.

|                                 | All patients<br>(n = 45) | Responders*<br>(n = 16) | Non responders*<br>(n = 29) | p-value     |
|---------------------------------|--------------------------|-------------------------|-----------------------------|-------------|
| <b>OVERALL</b>                  |                          |                         |                             |             |
| Healthy parenchyma              | 50 (17)                  | 53 (15)                 | 48 (18)                     | 0.38        |
| Emphysema                       | 0.02 [0.00;0.08]         | 0.00 [0.00;0.07]        | 0.03 [0.00;0.09]            | 0.20        |
| Ground glass                    | 44 (14)                  | 41 (11)                 | 46 (15)                     | 0.22        |
| Consolidation                   | 4 [2;9]                  | 4 [2;9]                 | 4 [2;9]                     | 0.94        |
| Ground glass + consolidation    | 51 (16)                  | 47 (15)                 | 53 (17)                     | 0.27        |
| <b>ANTERIOR</b>                 |                          |                         |                             |             |
| Healthy parenchyma              | 61 (15)                  | 63 (14)                 | 59 (16)                     | 0.43        |
| Emphysema                       | 0.01 [0.00;0.09]         | 0.01 [0.00;0.03]        | 0.02 [0.00;0.10]            | 0.34        |
| Ground glass                    | 37 (14)                  | 35 (13)                 | 38 (15)                     | 0.50        |
| Consolidation                   | 1 [0;2]                  | 1 [1;2]                 | 1 [1;2]                     | 0.87        |
| Ground glass + consolidation    | 39 (15)                  | 37 (14)                 | 40 (16)                     | 0.48        |
| <b>POSTERIOR</b>                |                          |                         |                             |             |
| Healthy parenchyma              | 38 (18)                  | 43 (17)                 | 35 (19)                     | 0.16        |
| Emphysema                       | 0.00 [0.00;0.05]         | 0.00 [0.00;0.00]        | 0.01 [0.00;0.06]            | <b>0.04</b> |
| Ground glass                    | 51 (16)                  | 47 (11)                 | 54 (17)                     | 0.14        |
| Consolidation                   | 7 [3;15]                 | 7 [4;14]                | 7 [3;17]                    | 0.96        |
| Ground glass + consolidation    | 62 (18)                  | 57 (17)                 | 64 (19)                     | 0.18        |
| <b>POSTERIOR/ANTERIOR RATIO</b> |                          |                         |                             |             |
| Healthy parenchyma              | 0.6 (0.2)                | 0.7 (0.2)               | 0.6 (0.2)                   | 0.11        |
| Ground glass                    | 1.5 (0.4)                | 1.5 (0.4)               | 1.5 (0.4)                   | 0.76        |
| Consolidation                   | 4.4 [2.5;6.4]            | 4.8 [3.3;6.5]           | 4 [2;7]                     | 0.75        |
| Ground glass + consolidation    | 1.7 (0.4)                | 1.6 (0.4)               | 1.7 (0.4)                   | 0.63        |
